# Supplementary material for: Nanoporous anodic aluminum oxide films for UV/vis detection of noble and non-noble metals
Source: Royal Society of Chemistry journal article supplement (doi:10.1039/c5ay02498f), 2015-11-27
Supplement: c5ay02498f1.pdf [file c5ay02498f1.pdf]

*Supplementary materials*

**Nanoporous anodic aluminum oxide films for UV/Vis detection of  
noble and non-noble metals**

Yuliya E. Silina,<sup>1\*</sup> Tatiana A. Kychmenko,<sup>2</sup> Marcus Koch<sup>1</sup>

<sup>1</sup>*INM-Leibniz Institute for New Materials, Campus D2 2, 66123 Saarbrücken, Germany*

<sup>2</sup>*Voronezh State University of Engineering Technologies, Voronezh, Russia*

\*Corresponding author:

Dr. Yuliya Silina  
Chemical Analytics,  
INM-Leibniz Institute for New Materials,  
Campus D2 2, 66123 Saarbrücken, Germany  
Tel: +49 681 9300-117  
Fax: +49 681 9300-242  
E-Mail: [yuliya.silina@leibniz-inm.de](mailto:yuliya.silina@leibniz-inm.de)

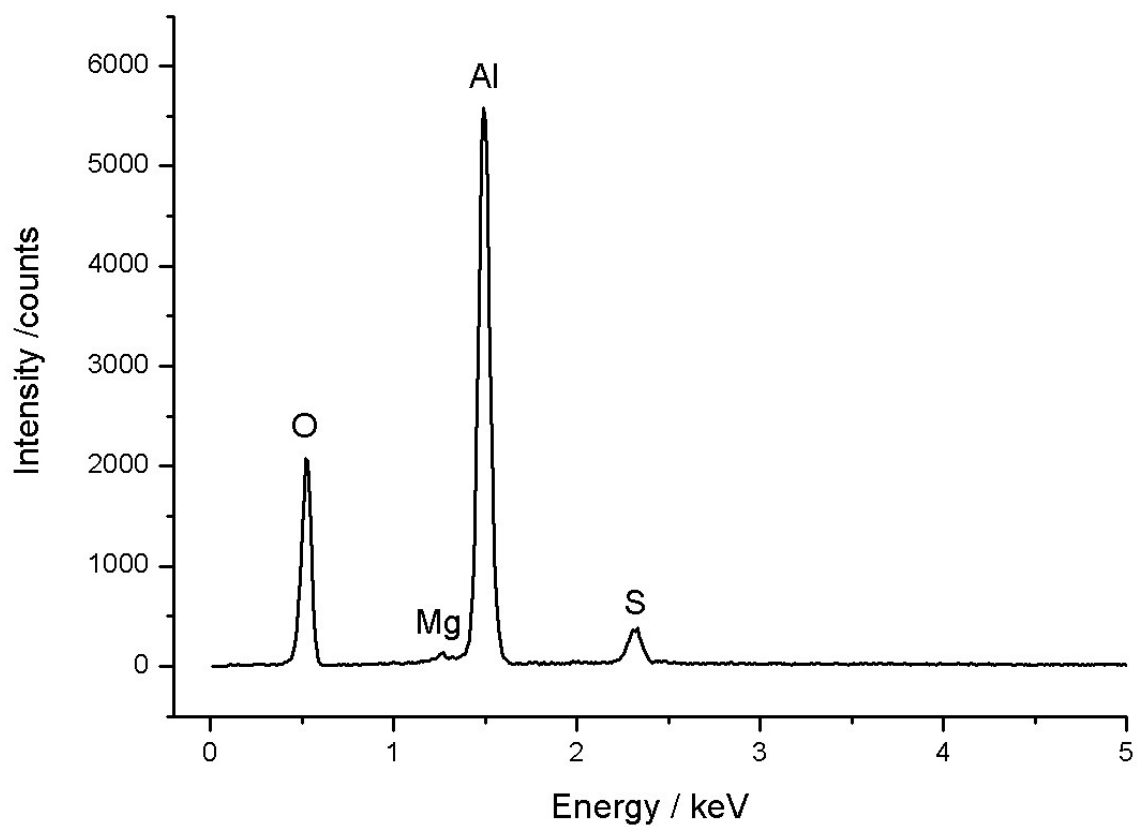

**Figure S1.** EDX spectra of Al-foil after two-step anodization in 0.6 M sulfosalicylic acid.

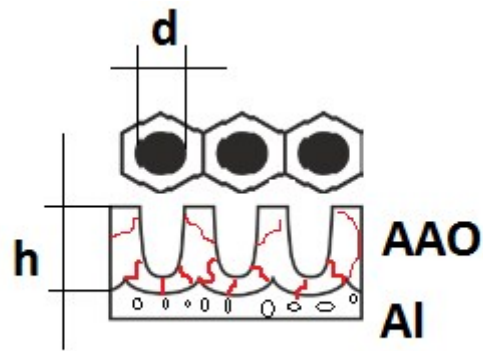

**Figure S2.** Schema of AAO fragment with Al-barrier layer:  $d$  – diameter of pore,  $h$ - height of pore. *Note:* possible places of Al migration through the micro-cracks within AAO are marked in red. If we assume a medium pore size of 50 nm, a pore distance of 10 nm and cylindrical channels inside the AAO, the porosity is equal to the pore surface ratio 54.5 %.

**Table S1.** Comparison of Al and Mg contents in distillate water before and after AAO immersion by ICP MS (immersion time 30 min, HR $\geq$ 10000)

| Element /isotopes      | Water before AAO    |        | Water after AAO     |        | Calibration formula        | R <sup>2</sup>         | LOD, ppt |
|------------------------|---------------------|--------|---------------------|--------|----------------------------|------------------------|----------|
|                        | Concentration, ppt* | RSD, % | Concentration, ppt* | RSD, % |                            |                        |          |
| <b>Al<sub>27</sub></b> | -51.4               | 5.5    | 2439.0              | 4.0    | $Y=14.98 \cdot X - 350.41$ | R <sup>2</sup> =0.9997 | 100-3000 |
| <b>Mg<sub>24</sub></b> | -141.4              | 3.6    | 258.2               | 1.7    | $Y=9.41 \cdot X + 573.40$  | R <sup>2</sup> =0.9999 | 100-1500 |
| <b>Mg<sub>25</sub></b> | -128.6              | 15.6   | 284.5               | 5.0    | $Y=1.24 \cdot X + 74.10$   | R <sup>2</sup> =0.9998 | 100-1500 |
| <b>Mg<sub>26</sub></b> | -107.7              | 3.4    | 298.9               | 5.7    | $Y=1.33 \cdot X + 53.36$   | R <sup>2</sup> =0.9992 | 100-1500 |

\* -results were obtained *via* subtraction of blind sample (distillate water).
